# Supplementary material
Source: ML conference proceedings conference paper supplement (https://openaccess.thecvf.com/content/CVPR2024/html/Yu_DiffCast_A_Unified_CVPR_2024_paper.html)
Supplement: Supplementary file 1 [file Yu_DiffCast_A_Unified_CVPR_2024_supplemental.pdf]

# DiffCast: A Unified Framework via Residual Diffusion for Precipitation Nowcasting

## Supplementary Material

### 7. Datasets Details

**SEVIR**, the Storm Event Imagery (SEVIR) [33] is an annotated, curated and spatio-temporally aligned dataset across five multiple data types including visible satellite imagery, infrared satellite imagery (mid-level water vapor and clean longwave window), NEXRAD radar mosaic of VIL (vertically integrated liquid mosaics) and ground lightning events. In this paper, we focus on the short term weather forecasting task and select all the radar mosaics of VIL as the main data. The dataset contains 20393 weather events from multiple sensors in 2017-2020. Each event consists of a 4-hour length sequence of images sampled in 5 minute steps covering  $384 \text{ km} \times 384 \text{ km}$  patches sampled at locations throughout the continental U.S.. As our task is to predict the future VIL up to 20 frames (100 min) given 5 observed frames (25 min), we follow [8] to sample the 25 continuous frames with stride = 12 in every event and split the dataset into training, validation and test sets with the time point January 1, 2019 and June 1, 2019, respectively. The frames are rescaled back to the range 0-255 and binarized at thresholds [16,74,133,160,181,219] to calculate the CSI and HSS following original settings in [33].

**MeteoNet** [17] is a multimodel dataset including full time series of satellite and radar images, weather models and ground observations. It covers geographic areas of  $550 \text{ km} \times 550 \text{ km}$  in the northwestern quarter of France and a span over three years, and records every 6 min from 2016 to 2018. Like the SEVIR, we split the radar sequence from 2016 to 2018 into training, validation and test sets with the time point January 1, 2018 and June 1, 2018, respectively. Then, we apply Algorithm 1 to filter precipitation events with a stride-20 sliding window to reduce the noise in the data. Note that a mean pixel threshold  $T_{pixel}$  is used as a filter to precipitation events. The data range of frames in MeteoNet is set to [0-70] and the thresholds are set to [12, 18, 24, 32] following [17] for the CSI and HSS evaluation.

**Shanghai Radar** [5] is a dataset contains continuous radar echo frames generated by volume scans in intervals of approximately 6 minute from October 2015 to July 2018 in Pudong, Shanghai. Every radar echo map covers  $501 \text{ km} \times 501 \text{ km}$  area. We follow [5] to preprocess the echo sequence and also apply Algorithm 1 to filter 25-frame weather event datasets. The data range of frames in Shanghai Radar is set to [0-70] and the thresholds are set to [20, 30, 35, 40] following [17] for the CSI and HSS computation.

**CIKM** is a radar dataset from CIKM AnalytiCup

2017 Competition, recording precipitation samples in  $101 \text{ km} \times 101 \text{ km}$  area of Guangdong, China. Each sample settles 15 historical radar echo maps as a sample in which the time interval between two consecutive maps is 6-minute. We follow [21] to process the dataset to pad each echo map into  $128 \times 128$  and follow the original setting to split training, validation and test sets. We transform the pixel in each frame to the reflectivity of [0,76] dBZ and use the thresholds [20,30,35,40] to compute the CSI and HSS.

The lengths of event sequences in each dataset are set to 25 frames except for the CIKM dataset with 15 frames. Compared to most of the existing studies, which aim to make an hour prediction (*e.g.*, 10 frames with a 6-minute interval), our tasks (except for CIKM dataset) are for the forecast in two hours (*i.e.* 20 frames) in this paper, which are more challenging. Although some recent studies attempt to achieve two hours prediction by frame interpolation (*e.g.*, predicting 10 frames with a 12-minute interval), this trick simplifies the complexity of precipitation dynamics and results in a degrading temporal resolution for prediction.

---

#### Algorithm 1 Weather Event Filtering

---

```
1: Given continuous frames  $s$ , pixel threshold  $T_{pixel}$ 
2:  $i \leftarrow 10$ 
3:  $L_{in}, L_{out} \leftarrow 5, 20$ 
4:  $event\_set \leftarrow \{\}$ 
5: while  $i + L_{out} < \text{Len}(s)$  do
6:   if  $\text{Mean}(s[i]) > T_{pixel}$  then
7:      $event \leftarrow s[i - L_{in} : i + L_{out}]$ 
8:      $event\_pixel \leftarrow \sum_{frame \in event} \text{Mean}(frame)$ 
9:     if  $event\_pixel \geq (L_{in} + L_{out})T_{pixel}/2$  then
10:      Add event to  $event\_set$ .
11:       $i \leftarrow i + L_{out}$ 
12:      Continue
13:   end if
14: end if
15:  $i \leftarrow i + 1$ 
16: end while
17: Return  $event\_set$ 
```

---

### 8. DiffCast: Implementation Details

In this section, we will give a detailed description of the implementation for DiffCast’s main architecture and its training and inference process, as well as our experimental settings.

Table 5. Detailed implementation of our Temp-Attn Block and GlobalNet.

| Temp-Attn Block    |                                           |                    |
|--------------------|-------------------------------------------|--------------------|
| ResBlock×2         | 2×[Conv3x3 + GroupNorm8+ SiLU] + Conv3x3  | Res Operator       |
| Temporal Attention | Conv5x5 (Spatial) + Conv1x1 (Temporal)+FC | Attention Operator |
| Down/Upsampler     | Conv1x1                                   |                    |
| GlobalNet          |                                           |                    |
| ResBlock×4         | 2×[Conv3x3 + GroupNorm8+ SiLU] + Conv3x3  | Res Operator       |
| ConvGRU×4          | Conv3x3 + Conv3x3; HiddenState            | GRU Operator       |
| Downsampler×4      | Conv1x1                                   |                    |

**Architecture of DiffCast.** We have described the main architecture of the DiffCast model in section 4.3. Here, we present our detailed implementation of the Temp-Attn Block and GlobalNet, which are mainly composed of temporal attention operator[3, 30] and ConvGRU operator[27, 37], respectively, as summarized in Table 5.

---

### Algorithm 2 Training of The Framework

---

- 1: **while** not converged **do**
  - 2: Sampling a sequence  $(x, y) \sim \mathcal{D}$ , where  $len(x) = L_{in}, len(y) = L_{out}$
  - 3: Making basic prediction  $\mu = \mathcal{P}_{\theta_1}(x)$ , where  $len(\mu) = L_{out}$
  - 4: Building residual sequence  $r$  following Eq. (7)
  - 5: Grouping segments  $s_j$  from  $r$  following Eq. (17)
  - 6: Extracting global hidden state  $h$  following Eq. (14)
  - 7: Sampling diffusion step  $t \sim \mathcal{U}(0, \dots, T)$
  - 8:  $\mathcal{L}_\epsilon \leftarrow 0$
  - 9: **while**  $j < \lceil \frac{L_{out}}{K} \rceil$  **do**
  - 10:  $\epsilon \sim \mathcal{N}(0, I)$
  - 11: Disturbing  $s_j$  to  $s_j^t$  following Eq. (1)
  - 12: Getting denoising loss  $\mathcal{L}_\epsilon^j$  following Eq. (19)
  - 13:  $\mathcal{L}_\epsilon = \mathcal{L}_\epsilon + \mathcal{L}_\epsilon^j$
  - 14: **end while**
  - 15: Computing deterministic loss  $\mathcal{L}_{\mathcal{P}}$  following Eq. (6)
  - 16: Computing final loss  $\mathcal{L}$  following Eq. (12) given  $\alpha$
  - 17:  $(\theta_1, \theta_2, \theta_3) \leftarrow (\theta_1, \theta_2, \theta_3) - \nabla_{(\theta_1, \theta_2, \theta_3)} \mathcal{L}$
  - 18: **end while**
- 

**Training and Inference.** The DiffCast is trained with an end-to-end manner as shown in Figure 2 (b), where the base deterministic predictor and residual diffusion model are optimized within the same training iteration. The complete training procedure is summarized in Algorithm 2. In the inference phase, the framework also utilizes the base predictor to estimate the global trend and then apply the diffusion model to generate the residual segments autogressively. The final prediction is obtained by combining the two components. The inference procedure is summarized in Algorithm 3.

**Experimental details** All experiments are conducted on a computer with NVIDIA A6000 GPU (48G memory) and all models, including DiffCast equipped with various backbones and single backbones, can fit in a single GPU. As for

---

### Algorithm 3 Inference of The Framework

---

- 1: Given initial frames  $x$
  - 2: Making basic prediction  $\mu = \mathcal{P}_{\theta_1}(x)$
  - 3: Extracting global hidden state  $h$  following Eq. (14)
  - 4:  $j \leftarrow 0, \hat{s}_{j-1} \leftarrow 0$
  - 5: **while**  $j < \lceil \frac{L_{out}}{K} \rceil$  **do**
  - 6:  $s_j^T \sim \mathcal{N}(0, 1)$
  - 7: **while** Reverse diffusion from  $t = T$  to  $t = 1$  **do**
  - 8:  $\epsilon \sim \mathcal{N}(0, I)$
  - 9: Estimating target noise  $\epsilon_{\theta_2}$  following Eq. (16)
  - 10: Recovering  $s_j^{t-1}$  from  $s_j^t$  following Eq. (5)
  - 11: **end while**
  - 12: Getting current residual segment  $\hat{s}_j$
  - 13: **end while**
  - 14: Computing target frames  $\hat{y}$  following Eq. (13)
- 

the implementation of various backbones, we easily rebuild the most backbones from OpenSTL [31] library to adapt with DiffCast. We construct the GTUNet with a hierarchical UNet architecture with temporal attention blocks. This structure is composed of four up/down layers, with a hidden size of 64, and is subsequently upscaled/downscaled by factors of 1,2,4,8, respectively. Despite the increased number of parameters (*e.g.*, from 20.13MB to 66.40 MB for DiffCast\_MAU) and higher training costs (*e.g.*, from 18 hours at 12 batch size to 23 hours at 6 batch size for 30K iterations) associated with the DiffCast framework, we can attain a great paramount for modeling the distribution of stochastic temporal evolution. Furthermore, the DiffCast framework can expedite the forecast by utilizing optimization techniques such as DDIM, DPM-solver *etc.* This capability can fully meet the requirements of short-term precipitation forecasting task in real-world scenarios (*e.g.*, 17 seconds to produce 20-frame forecasts), enabling real-time predictions that are both more accurate and realistic.

## 9. Additional Analysis

In this section, we give an extra analysis on the design of framework loss, the computational complexity and the hyperparameter  $K$ .

**w/o stochastic Loss.** We decompose the determinism and local stochastics in precipitation evolution and model them with a deterministic component and a residual diffusion component, respectively. Different from other two-stage frameworks, we train the overall framework in an end-to-end manner to simulate the interplay between the determinism and uncertainty, which indicate that the gradient from stochastic diffusion denoising loss can also optimize the deterministic backbone. In Table 6, we compare the performance between the pure deterministic backbones and the intermediate output  $\mu$  from deterministic component in

Table 6. Analysis of performance for backbones with different optimization strategies on SEVIR.

| Deterministic Method        | CSI           | CSI-pool4     | CSI-pool16    | HSS           | LPIPS         | SSIM          |
|-----------------------------|---------------|---------------|---------------|---------------|---------------|---------------|
| SimVP                       | 0.2662        | 0.2844        | 0.3452        | 0.3369        | 0.3914        | 0.6570        |
| DiffCast_Simvp- $\mu$       | <b>0.2690</b> | <b>0.2828</b> | <b>0.3134</b> | <b>0.3320</b> | <b>0.3961</b> | <b>0.6728</b> |
| Earthformer                 | <b>0.2513</b> | <b>0.2617</b> | <b>0.2910</b> | <b>0.3073</b> | <b>0.4140</b> | <b>0.6773</b> |
| DiffCast_Earthformer- $\mu$ | 0.2490        | 0.2579        | 0.2834        | 0.3040        | 0.4391        | 0.6685        |
| MAU                         | 0.2463        | 0.2566        | 0.2861        | 0.3004        | <b>0.3933</b> | 0.6361        |
| DiffCast_MAU- $\mu$         | <b>0.2542</b> | <b>0.2848</b> | <b>0.3157</b> | <b>0.3361</b> | 0.3929        | <b>0.7028</b> |
| ConvGRU                     | 0.2560        | 0.2685        | 0.3005        | 0.3124        | 0.3785        | <b>0.6764</b> |
| DiffCast_ConvGRU- $\mu$     | <b>0.2635</b> | <b>0.2873</b> | <b>0.3197</b> | <b>0.3350</b> | <b>0.3860</b> | <b>0.6818</b> |
| PhyDNet                     | 0.2560        | 0.2685        | 0.3005        | 0.3124        | 0.3785        | 0.6764        |
| DiffCast_PhyDNet- $\mu$     | <b>0.2659</b> | <b>0.2785</b> | <b>0.3105</b> | <b>0.3252</b> | <b>0.3748</b> | <b>0.6811</b> |

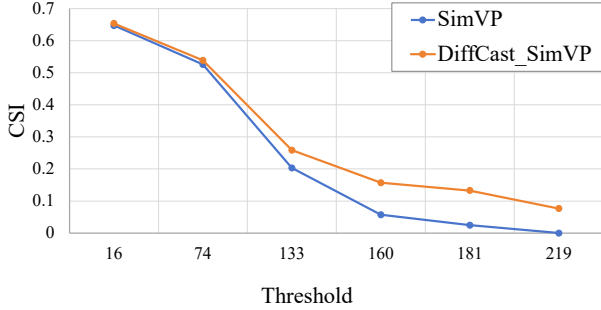

Figure 8. CSI with threshold

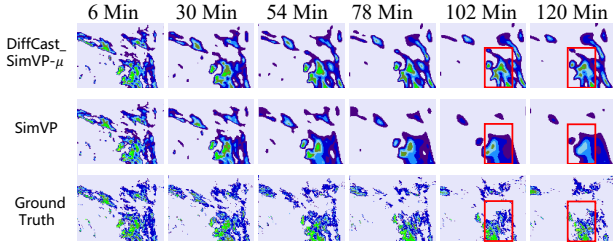

Figure 9. Qualitative results of SimVP w/o stochastic loss.

DiffCast. The results show that the stochastic loss indeed leads to a positive optimization on most of the deterministic backbones.

We point out that the conventional deterministic methods always under-estimate the high-value echoes with the increasing lead time (shown in Figure 1). To further investigate this, we show in Figure 8 the performance of DiffCast\_SimVP, in terms of different thresholds. We observe that with the stochastic modeling the high-value echoes indeed can be more accurately maintained and predicted. Additionally, we show the qualitative results of SimVP w/o stochastic diffusion loss in Figure 9. The results indicate that DiffCast\_SimVP- $\mu$  alleviates the echo value fading away issue compared to SimVP, which implies that stochastic objectives indeed help optimize the deterministic model.

**Complexity and Hyperparameter  $K$ .** In Table 7, we report the tradeoff between model size, memory and time cost conditioned on different segment length based on our

Table 7. Complexity analysis and hyperparameter  $K$ .

|                    | Model Size | CSI           | Training |           | Inference |           |
|--------------------|------------|---------------|----------|-----------|-----------|-----------|
|                    |            |               | Memory   | Time Cost | Memory    | Time Cost |
| MAU                | 20.13M     | 0.2463        | 21759MB  | 14.5h     | 2297MB    | 0.29s     |
| DiffCast_MAU(K=2)  | 66.38M     | 0.2638        | 43815MB  | 22.8h     | 3881MB    | 42s       |
| DiffCast_MAU(K=4)  | 66.39M     | 0.2697        | 35471MB  | 20.5h     | 3731MB    | 21s       |
| DiffCast_MAU(K=5)  | 66.40M     | <b>0.2716</b> | 33791MB  | 19.5h     | 3815MB    | 16s       |
| DiffCast_MAU(K=10) | 66.43M     | 0.2548        | 30443MB  | 18.5h     | 4065MB    | 8s        |

experimental setting with batchsize=4 for 30K training iterations.  $K$  is selected from  $\{2, 4, 5, 10\}$  on validation set and  $K=5$  delivers the best tradeoff. There are more requirements for memory compared with base predictor but it is acceptable in our practical application. It is notable that the model size is not influenced by  $K$ .

## 10. More Qualitative Results

In this section, we show more illustrative examples on different datasets to compare our DiffCast with baseline methods. As shown in Figure 10, 12, 11, 13, all deterministic backbones deliver blurry results after 60 minutes, with a phenomenon of high-value echoes and details fading away. However, when equipped into our DiffCast framework, all the prediction results of the backbones are consistently enhanced, where the forecast images are not blurry anymore, and the high-value echoes and details are carefully preserved. All the observations validate the effectiveness of the proposed DiffCast framework.

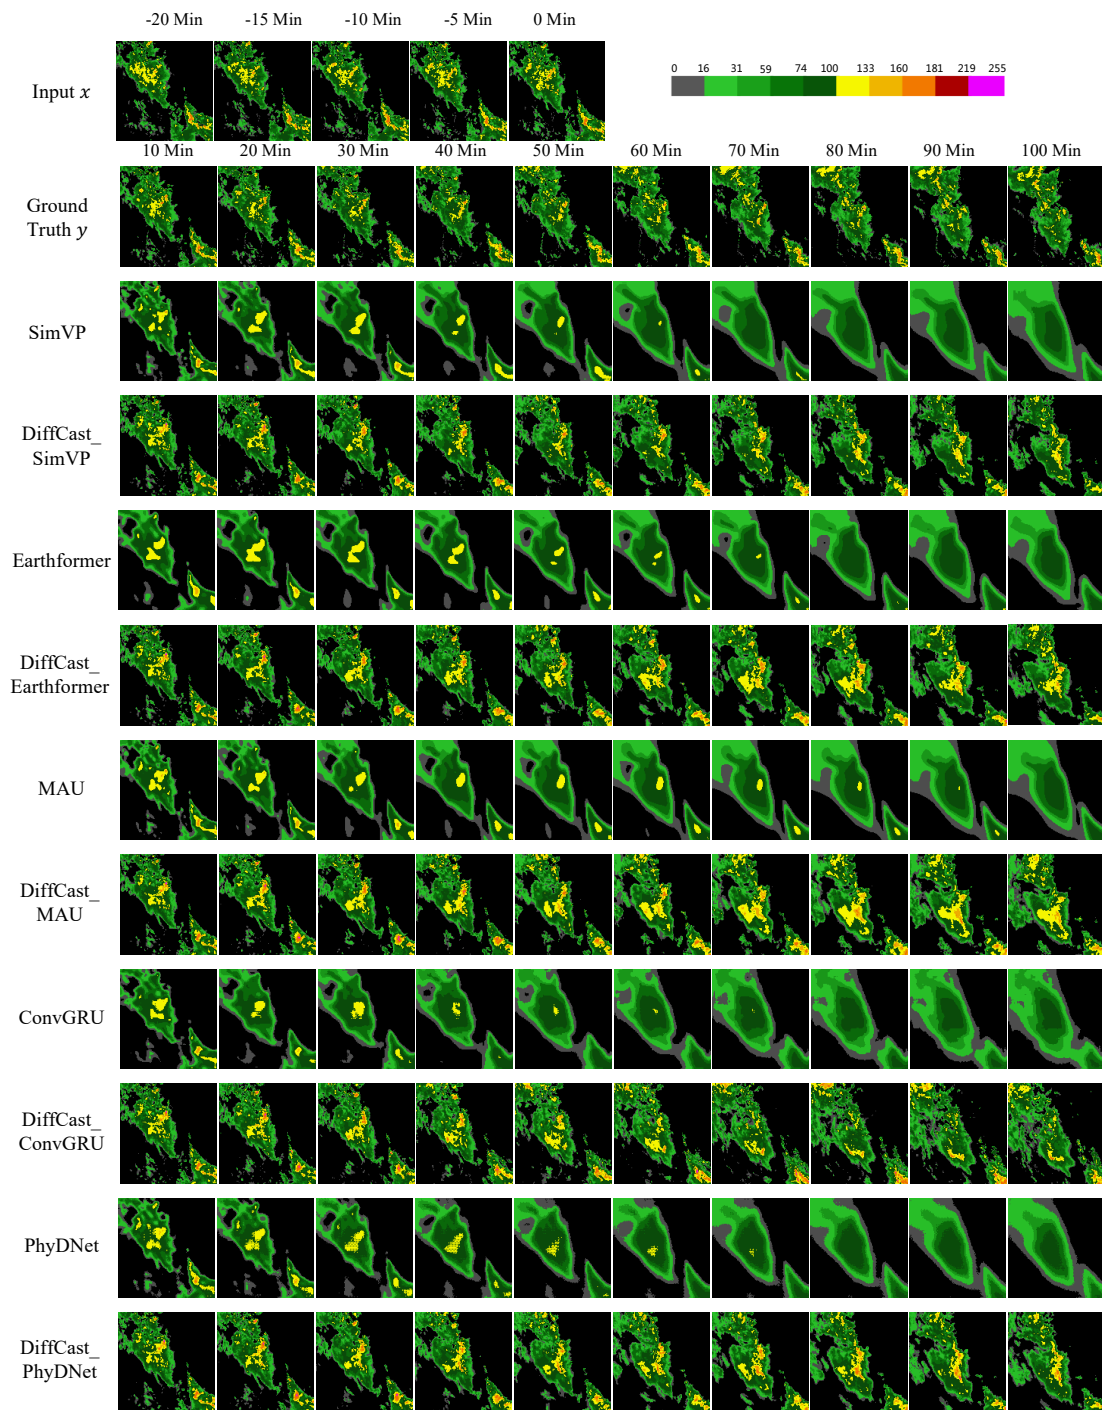

Figure 10. Prediction examples on the SEVIR.

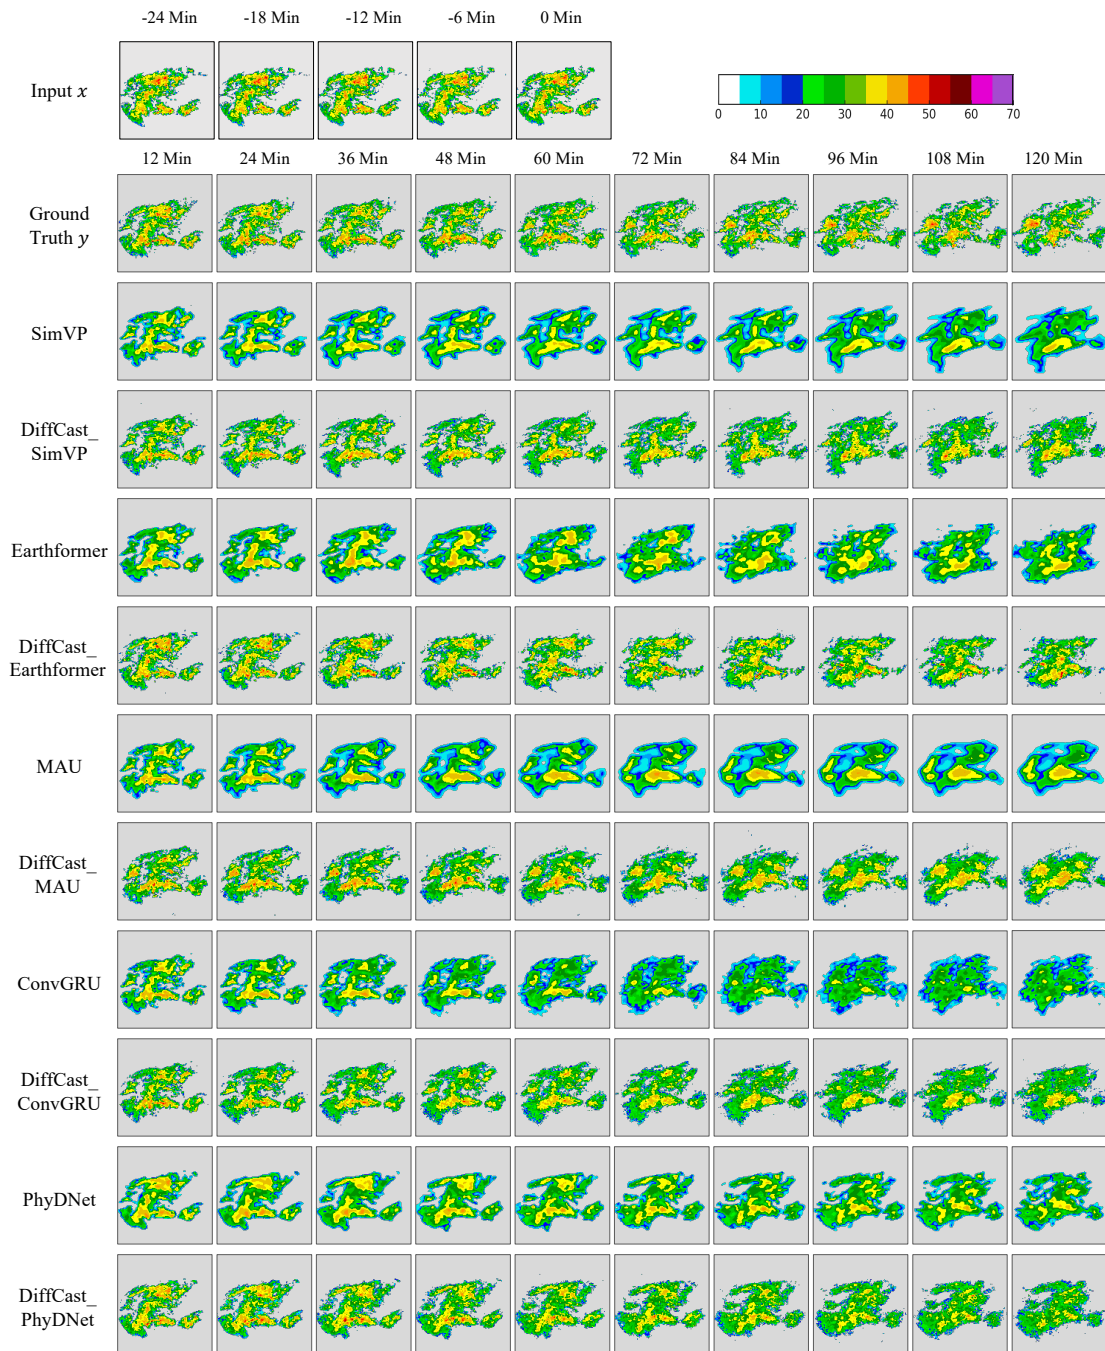

Figure 11. Prediction examples on the Shanghai Radar.



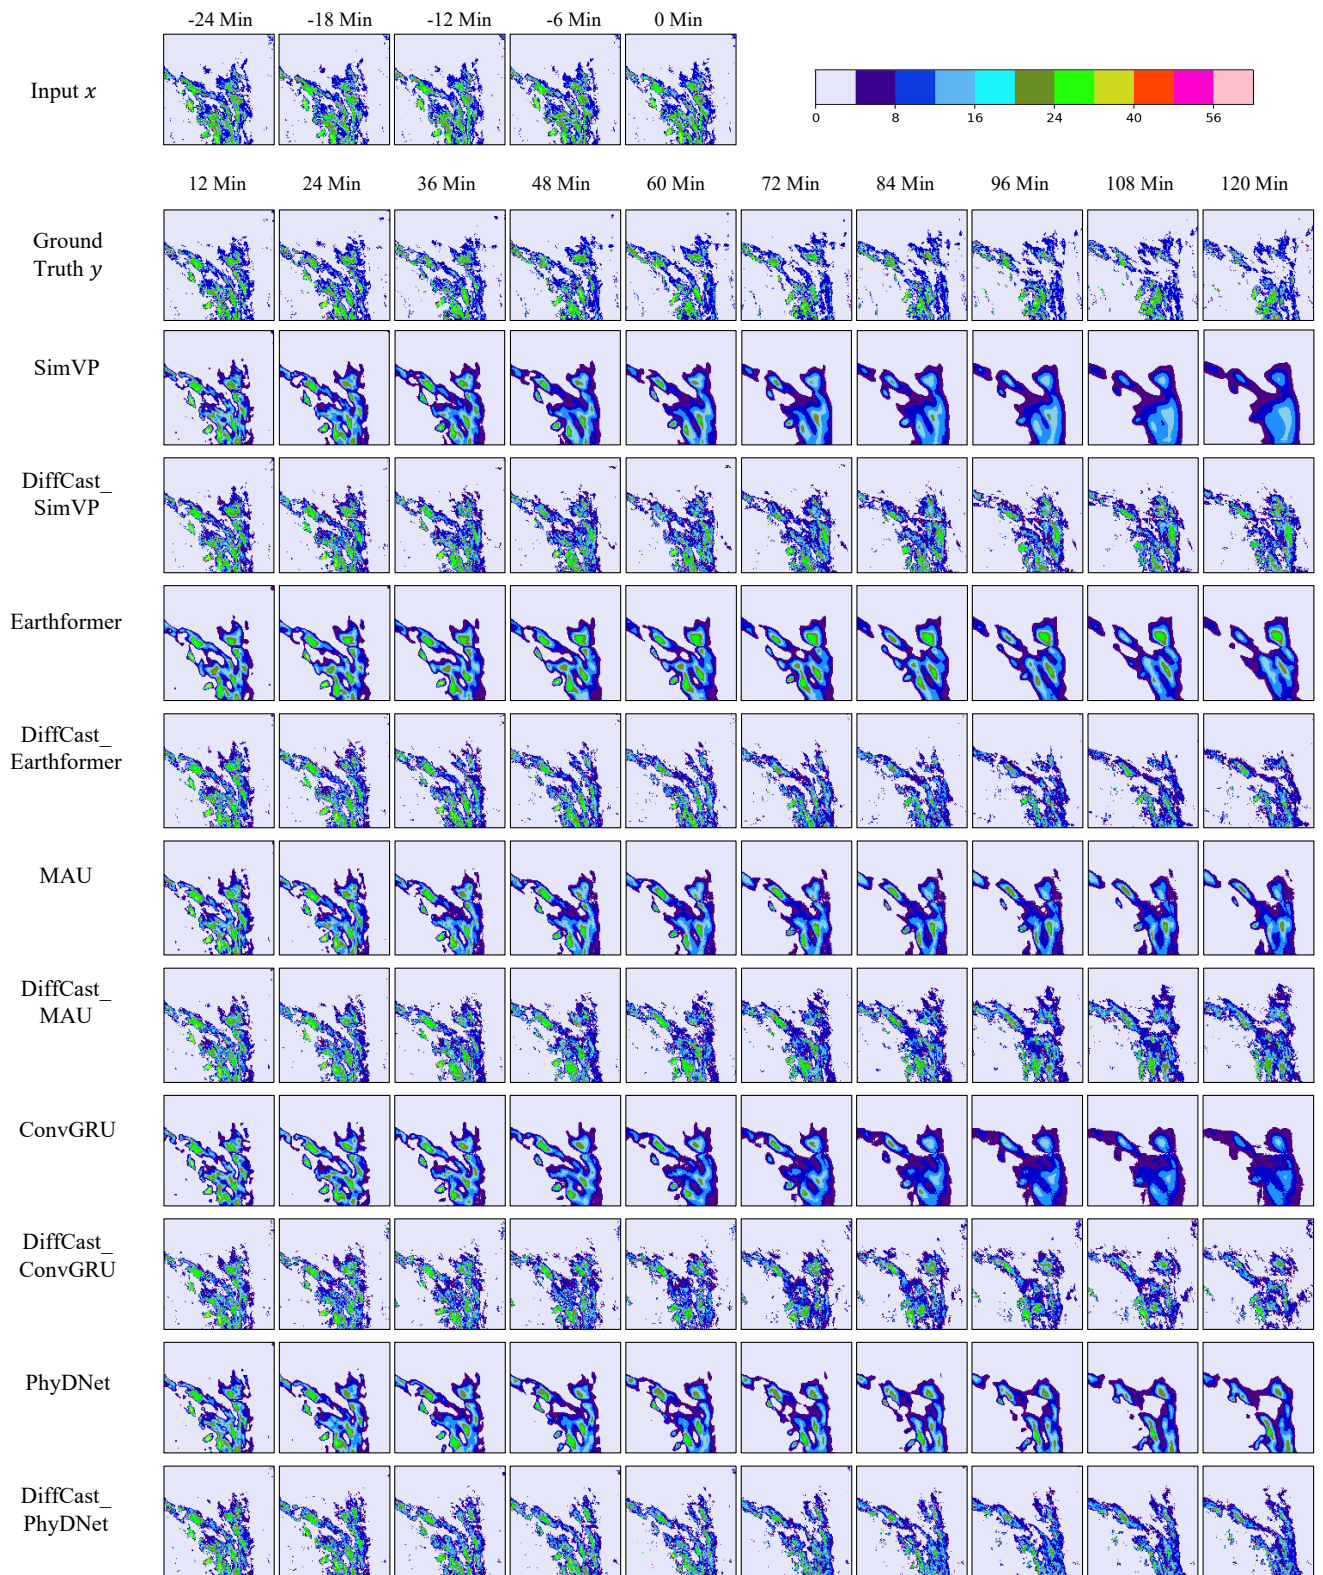

Figure 12. Prediction examples on the MeteoNet.

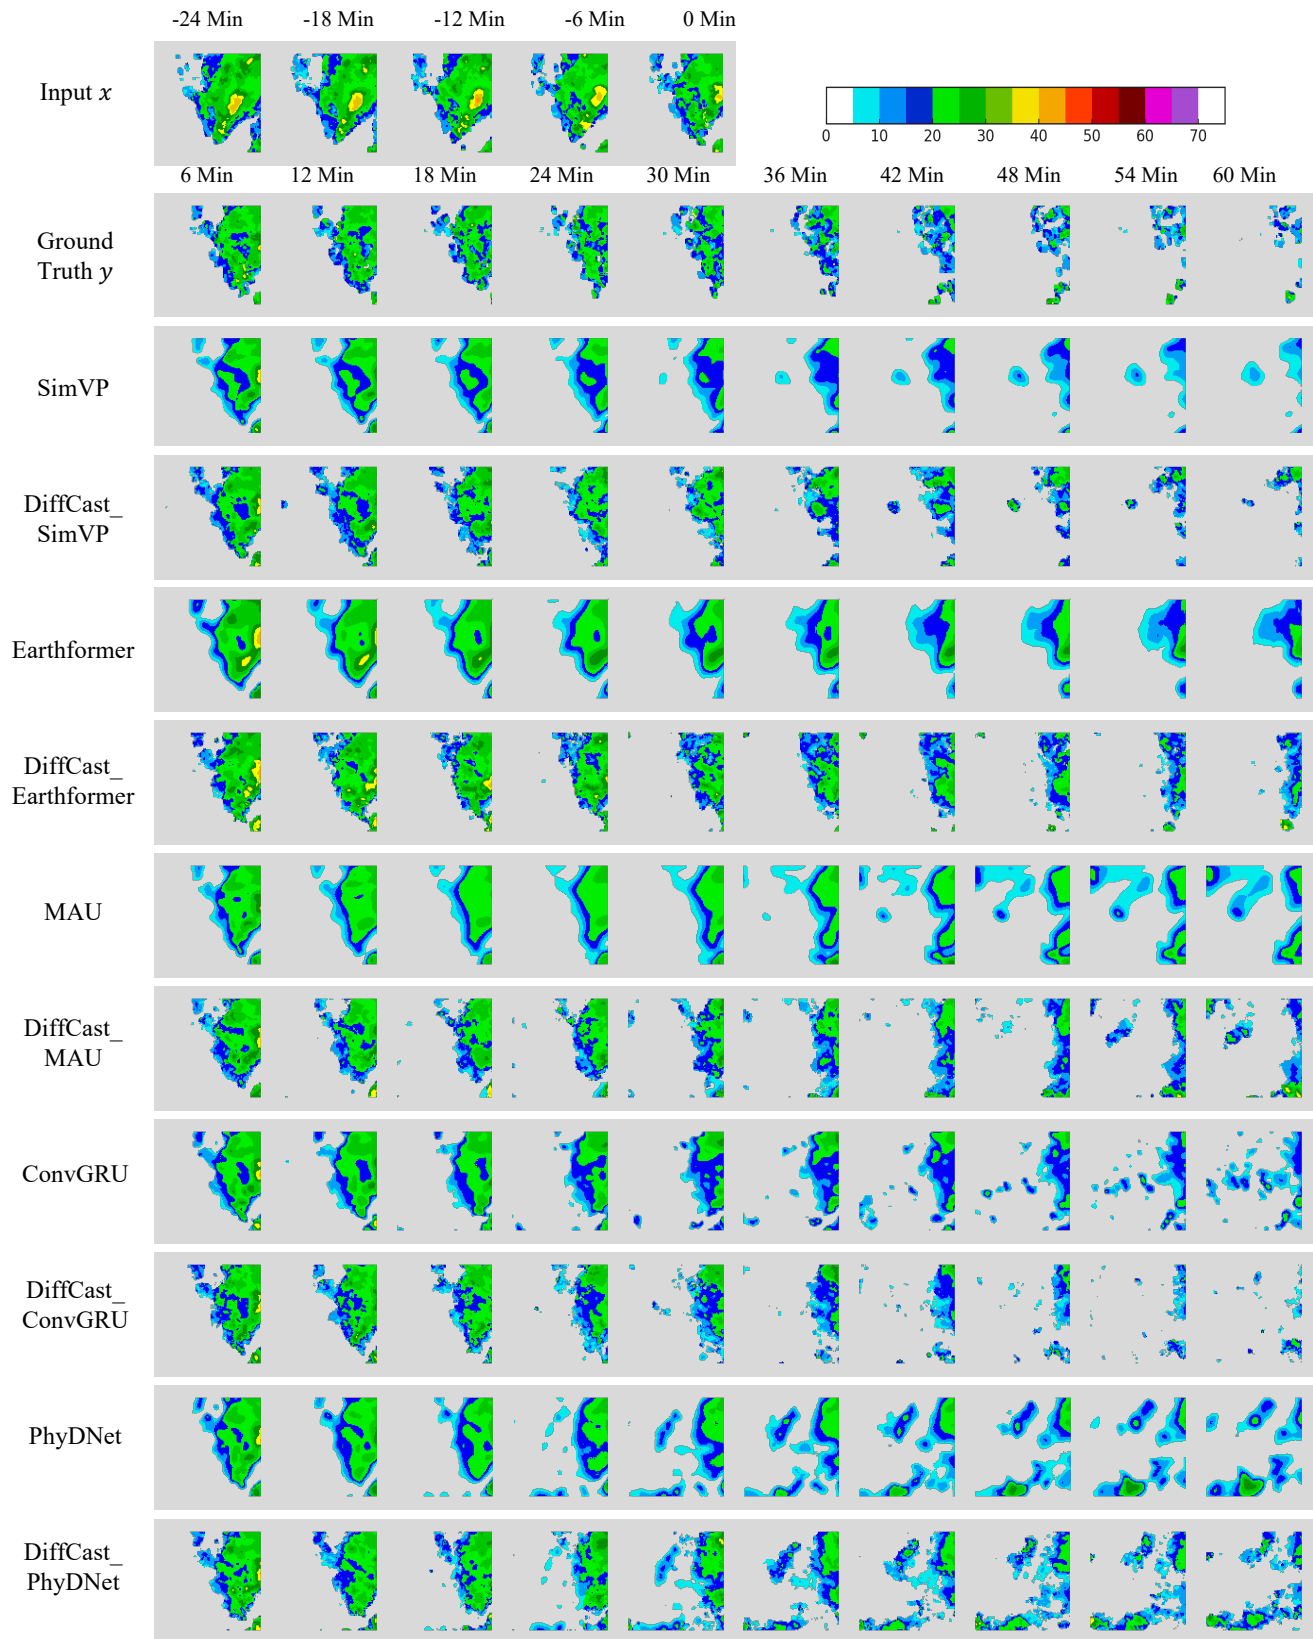

Figure 13. Prediction examples on the CIKM dataset.
